# Supplementary material for: Arousal modulates the motor interference effect stimulated by pictures of threatening animals
Source: PeerJ. 2021 Feb 11;9:e10876. doi: 10.7717/peerj.10876 (PMC7882135; doi:10.7717/peerj.10876)
Supplement: Supplemental Information 2 — Centroparietal P3 amplitudes as a function of valence (negative, neutral and positive), arousal (medium versus high) and Go/NoGo factor (Go versus NoGo). [file peerj-09-10876-s002.xlsx]

## Sheet: Sheet1
go						nogo
negative		positive		neutral		negative		positive		neutral
medium	high	medium	high	medium	high	medium	high	medium	high	medium	high
5.12	4.11325	4.88589	4.15393	4.92521	4.51542	2.79125	2.71717	3.30035	3.09992	4.6382	3.83077
2.53751	4.25328	3.35273	3.88405	3.88081	3.55653	5.91707	7.01285	5.9549	6.23174	6.5446	6.12667
2.40093	2.83109	3.25821	4.77908	4.19794	4.63323	7.34028	7.30655	6.86705	7.29163	6.87964	7.23276
7.27491	8.78062	6.9019	7.26605	7.87414	6.9772	6.45961	6.85831	6.71476	7.10939	4.92757	5.98894
2.92434	2.37176	3.56402	2.9955	2.13133	3.22105	1.93817	2.55919	2.67847	2.04025	3.76123	2.36886
2.51689	4.29966	2.98383	3.58179	4.07053	3.74477	2.56395	4.16431	2.01534	1.86166	1.6412	2.65649
-0.0965874	1.98799	1.40898	0.968012	2.35868	0.945355	1.73908	1.24828	3.22946	2.04737	2.85964	1.1074
-0.923398	-0.342521	1.24942	-0.858309	-0.272305	0.161635	0.0235512	-0.775108	-0.234703	1.43534	-0.535834	0.535092
4.52083	3.52715	4.20651	3.51541	4.3632	4.93053	4.12891	3.22263	4.21702	2.84107	2.95363	3.83191
2.63726	2.40774	2.89518	2.04282	2.39334	2.04653	-0.125573	-0.797674	-0.329411	-0.25175	-0.189966	-0.385886
2.50292	4.58341	5.59907	5.23131	5.59022	4.11516	1.85647	5.50434	4.0667	4.75967	3.61496	5.28691
0.476745	0.435307	-0.645571	-0.924179	-0.932016	-0.557127	0.967456	-0.0214694	0.319356	0.846764	1.1572	1.74663
2.85647	4.41065	5.05976	4.80582	4.68041	4.21492	2.91199	5.11916	5.34357	3.03143	3.11713	3.46846
4.78057	6.61835	4.83351	5.17559	5.07704	5.98551	2.39211	3.90564	2.85677	3.69957	3.61266	2.69086
1.42142	1.51119	1.97707	1.12094	0.226835	1.34486	0.449784	1.25048	-0.970044	-1.61009	-1.06419	-0.887338
-1.2492	-1.35255	-0.775128	-1.84863	-1.852	-0.99136	3.8517	4.83046	3.23583	3.2434	5.34997	3.14676
-2.00251	-0.0612354	0.229073	-1.53852	-1.27857	1.14423	0.68018	1.38783	1.12965	1.25455	0.4504	0.765353
11.3462	8.29937	8.46562	8.46685	10.4006	8.55896	8.18853	6.96227	7.1539	6.26745	7.06068	7.0505
4.94249	5.29558	4.31714	5.47655	5.94165	4.71303	4.30838	3.94524	3.74867	3.42345	5.56037	4.37236
2.89159	4.23943	4.68342	4.12285	3.553	4.28995	-2.02325	-0.56215	-1.76859	-0.269551	-0.984	-0.857648
3.539	4.65899	7.19606	4.64761	3.6997	5.72579	0.892781	2.41457	2.17496	0.926451	1.25653	1.97549
3.63855	3.12319	2.70963	3.66832	5.19136	3.98893	0.379496	0.487735	-0.556924	-1.52055	-0.586676	-0.169168
0.696284	0.579267	0.313058	0.675013	0.350354	0.0908626	1.07999	1.05568	1.69419	1.68387	2.16371	1.35622
4.11488	3.6793	4.04452	1.40349	2.85723	3.66109	1.73334	2.8643	1.35536	0.760729	1.78814	2.71396
4.62409	6.47582	7.88287	6.61203	7.39966	8.09826	6.08333	6.31535	7.01655	6.17863	7.04345	7.59127
1.44234	3.12845	2.68073	2.42613	2.84753	0.987541	-0.161183	1.01945	1.61058	1.23107	0.403853	-0.0637952
0.876545	1.01732	-0.35502	-0.100703	-0.152336	0.753362	0.262398	0.208541	0.202416	0.509443	0.0828766	-0.357937
0.442906	1.57779	1.57007	2.46167	1.37578	1.55912	-0.186689	-0.00786486	1.56475	0.153837	1.08948	-1.43586
7.83462	6.34377	6.46135	6.10783	4.47987	6.72741	3.32697	3.56673	2.65671	4.32096	4.97908	3.87618
-1.11131	-1.77885	-1.05637	-1.76826	-1.22699	-1.13676	-0.523999	1.45356	0.317353	0.0283876	0.899707	1.38767
-0.754383	-2.61128	-0.692011	-1.78294	-0.236549	-1.50518	1.84808	0.428883	2.48065	1.67635	2.06544	3.75562
5.82935	8.62222	7.0815	7.87268	9.1802	7.80648	5.32933	9.09936	6.32527	6.33706	9.58815	5.77289
3.80374	3.23115	3.94702	2.68297	4.08451	2.37267	2.01034	4.47352	4.5662	4.25999	3.4361	3.26992
6.71336	8.1349	7.74775	6.53975	6.00808	7.35867	3.14021	4.99209	3.90149	2.55582	3.95079	3.62641
1.0084	2.74618	1.1149	1.27235	1.52133	0.301901	1.28608	2.53406	1.55375	2.26168	2.02148	1.10455
8.03024	8.02187	6.12219	7.49202	6.52439	7.45005	1.87374	2.89292	1.42652	0.603279	2.6136	0.168849
5.03226	2.57987	1.80032	1.12887	3.9403	1.40536	2.25573	6.20691	3.42001	5.57428	3.90983	4.42704
6.23428	6.35965	6.2995	4.45145	7.11238	5.97369	2.48913	3.39477	0.785661	0.69581	3.5642	0.575889
-3.05892	-2.06099	-2.54564	-2.57451	-3.24812	-2.64708	-1.1266	0.160673	-0.0509515	0.394433	-0.867928	0.89678
7.68778	7.9211	6.27571	6.98031	7.40983	8.04692	6.89073	6.19786	5.26855	6.68964	7.4331	6.41741
0.0589925	0.85795	-0.092266	0.783669	1.73594	1.96231	2.07836	4.36253	3.38541	4.92088	0.89142	5.86818
-0.504976	0.254504	-0.475888	-1.34108	-1.39303	-0.540767	-1.13555	-0.189449	-0.785572	-1.08413	-1.77422	-1.87811
-4.52682	-3.92973	-4.42822	-3.39407	-5.28909	-3.03995	-4.04072	-5.4132	-1.4518	-3.03746	-3.67909	-3.4776
4.44533	4.17422	3.83677	1.39369	3.00824	3.10469	0.888802	2.40955	1.99451	1.58022	1.87856	1.51224
5.40827	6.06749	5.84252	4.60051	6.12841	5.50107	3.98581	6.53134	5.07473	4.13462	4.4853	4.55646
2.68547	2.90957	2.16384	1.89959	2.64173	1.78069	3.71141	4.27387	3.57569	3.00252	1.47295	2.50264
4.45811	4.45707	4.44474	3.65127	4.21538	4.84669	6.11346	6.5652	5.94671	6.12071	5.32118	6.03834
7.71467	7.88514	8.00694	6.53906	6.81375	7.42534	2.51496	2.71401	1.62258	0.850782	0.683321	1.18262
9.27704	7.65673	7.86739	7.21463	8.8419	6.45892	6.31148	7.20321	6.51487	6.73731	7.73357	4.91596
-0.210529	0.118887	0.172739	0.71542	0.672469	0.78284	-3.0979	-3.78239	-3.06364	-4.03031	-3.59264	-4.11988
-4.66681	-4.85002	-5.72082	-6.22338	-5.92727	-6.06365	-3.14283	-2.85208	-4.24781	-3.62863	-3.22704	-3.68344
4.64319	7.95402	6.33732	7.45179	7.51426	7.6294	4.18098	6.67543	4.86879	5.23879	5.49135	6.0673
7.47425	7.25926	7.52054	7.55284	8.79431	9.33176	4.37148	5.09555	3.06865	3.3271	3.43231	3.88817
3.20813	3.94799	3.6575	3.13008	3.53426	3.37422	5.74261	5.82383	6.14207	5.11491	5.72018	6.50582
-5.97303	-4.6409	-4.75815	-6.55289	-5.69761	-4.22518	1.53343	0.778634	1.29213	-0.575043	1.54485	2.312
5.14409	4.51348	4.53298	4.28988	5.12077	4.69687	1.30805	2.38024	2.90166	2.09396	1.01055	0.110313
6.87581	7.38659	7.08036	6.37361	7.71262	7.13233	4.43801	5.48074	6.91531	5.54416	6.06974	4.37016
1.68119	2.82323	2.7371	1.63219	3.4591	4.79047	-2.35152	-0.227949	-1.56077	-2.02195	-1.38903	-1.35028
-5.18601	-1.55355	-4.07632	-4.44809	-3.18917	-2.69109	-2.2395	-0.508772	-1.05553	-1.4343	-2.81353	-1.71428
5.17449	6.55139	5.23375	4.12755	5.54751	4.8034	2.98921	3.20542	2.80291	3.39816	3.56087	3.7975
6.0888	5.3889	5.05608	4.96825	7.30595	5.45237	7.26522	7.30748	4.6399	5.15265	7.59993	5.97556
2.44658	3.35217	1.79816	1.27847	2.28431	3.09597	-0.18908	1.1696	1.38398	1.39355	1.74559	0.720673
1.45145	3.51583	2.46859	-0.816193	1.10867	-0.108958	4.4596	3.54123	4.87617	3.26799	3.82834	4.23107
1.10795	2.43863	1.03126	1.78984	1.86957	0.664035	-0.645789	-0.451719	0.0760211	-1.43983	-1.77136	-1.93156
4.14119	3.44629	2.80429	3.04057	4.5925	4.13152	1.07272	2.80099	0.0850807	1.50115	0.952511	0.797269
7.38334	7.55964	7.80668	7.78127	7.03298	7.77067	6.88363	4.97318	5.78937	6.52339	5.28716	5.08791
2.38927	4.85192	3.57941	2.15141	2.24101	2.6394	6.20008	5.01968	4.61847	5.35885	4.99263	5.1425
-1.12982	-1.41439	-0.313237	0.198938	-2.36778	-0.242786	-0.361449	-0.151464	-0.540332	0.126516	-1.19476	-1.11422
4.75726	4.88192	5.6547	4.02025	4.54242	5.33956	3.07315	2.60045	2.6722	3.47271	3.47582	2.80879
2.29663	2.52518	1.67965	0.140778	3.98057	0.886973	1.36703	1.46504	2.04678	2.78046	3.8287	1.09136
6.74763	7.58243	7.40881	7.11914	6.04615	7.24564	3.52566	3.10658	4.4354	4.19076	4.23475	2.60838
-2.09944	-0.155256	-0.0343334	-1.15217	-1.95698	-1.0303	0.463143	0.645531	-0.414807	0.655739	0.943698	1.22163
1.87959	2.15559	3.55981	2.23648	1.40743	3.40754	3.19132	5.50519	5.48055	4.22223	2.63352	4.82561
-0.574337	-0.044963	-0.393885	-0.113431	-0.459042	1.15325	0.78019	1.0078	0.932797	1.67063	0.047409	1.39158
